# Supplementary material for: Eco-friendly synthesis of cuprizone-functionalized luminescent carbon dots and application as a sensor for the determination of copper(ii) in wastewater
Source: Royal Society of Chemistry journal article supplement (doi:10.1039/c8ay00928g), 2018-01-01
Supplement: c8ay00928g1.pdf [file c8ay00928g1.pdf]

## Supplementary Information

### **Eco-friendly synthesis of cuprizone-functionalized luminescent carbon dots and application as sensor for the determination copper(II) in wastewater**

Vinicius Azevedo Moreira<sup>a</sup>, Mathews de Oliveira Krambeck Franco<sup>a</sup>, Francisco Fernandes Gambarra Neto<sup>b</sup>, Willian Toito Suarez<sup>a\*</sup>

*<sup>a</sup> Chemistry Department, Federal University of Viçosa, Viçosa 36570-900, MG, Brazil*

*<sup>b</sup> Brazilian Enterprise for Agricultural Research, Campina Grande 58428-095, PB, Brazil*

Corresponding author.

*E-mail address:* williants@ufv.br (W. T. Suarez).

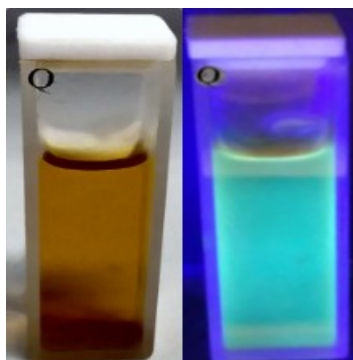

Fig. S1. CDs under visible light and 350 nm UV light.

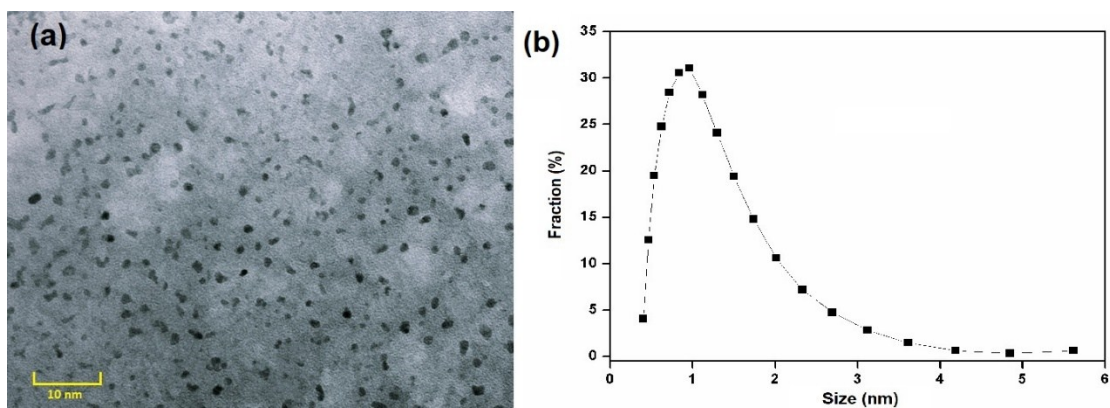

Fig. S2. Morphology characterization of the produced CDs. (a) TEM images (b) The size distribution of the CDs by DLS.

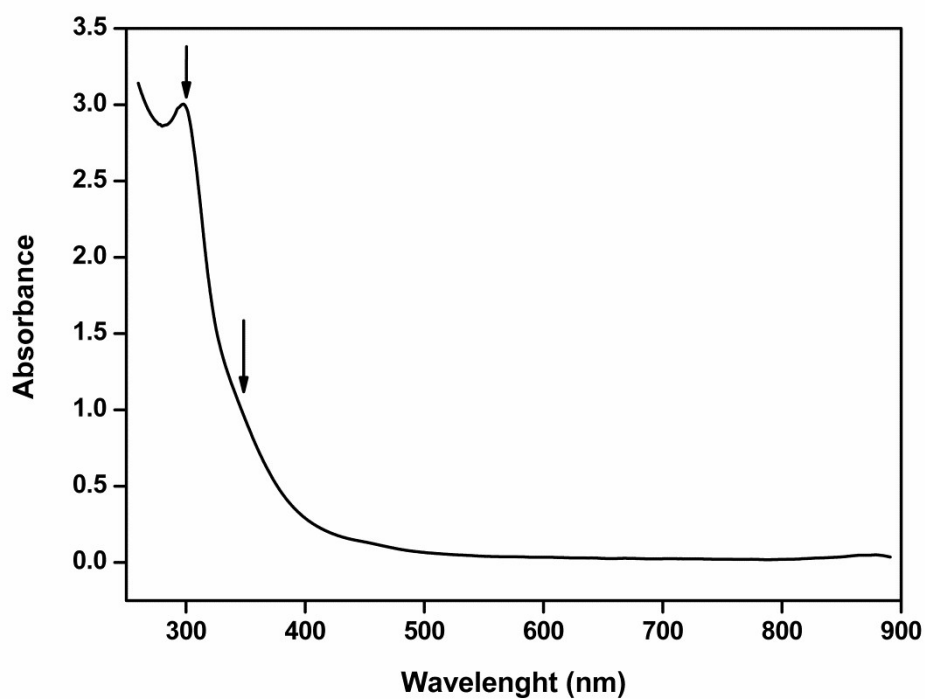

Fig. S3. UV/vis absorption spectra of the produced CDs.

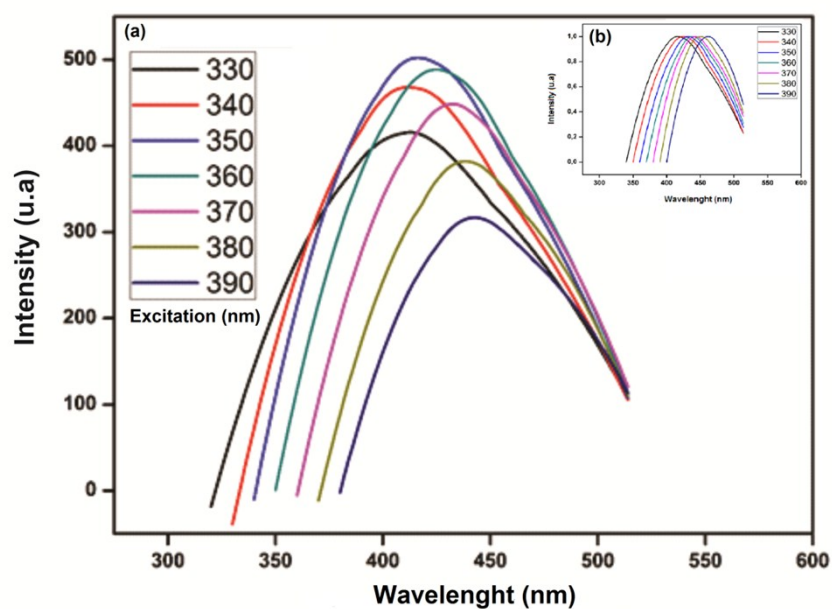

Fig. S4. (a) The corresponding emission spectra of CDs at different excitation wavelength from 330 to 390 nm with 10 nm increments. (b) The emission spectra normalized.

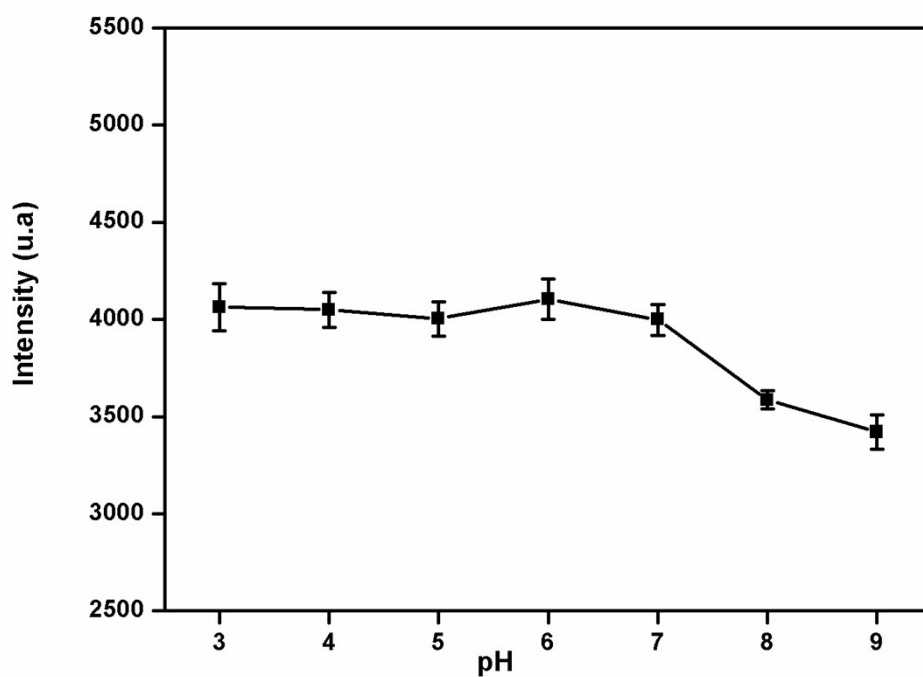

Fig. S5. The fluorescence intensities of CDs at 430 nm (excitation at 350 nm) with different pH values.

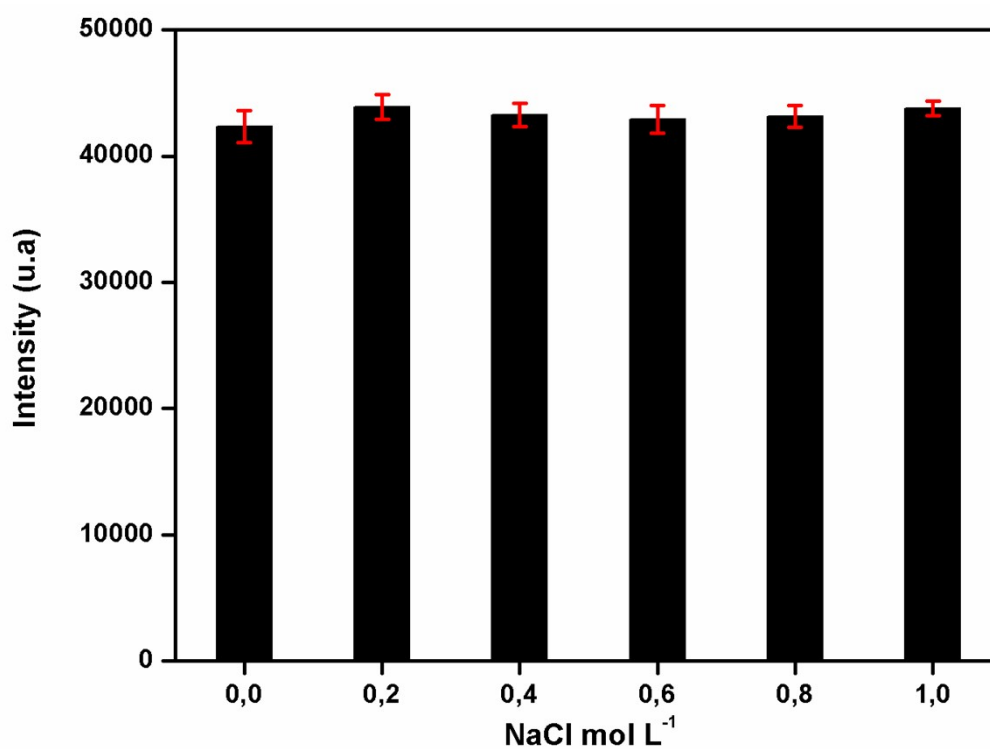

Fig. S6. The fluorescence intensities of the produced CDs with different sodium chloride concentrations.

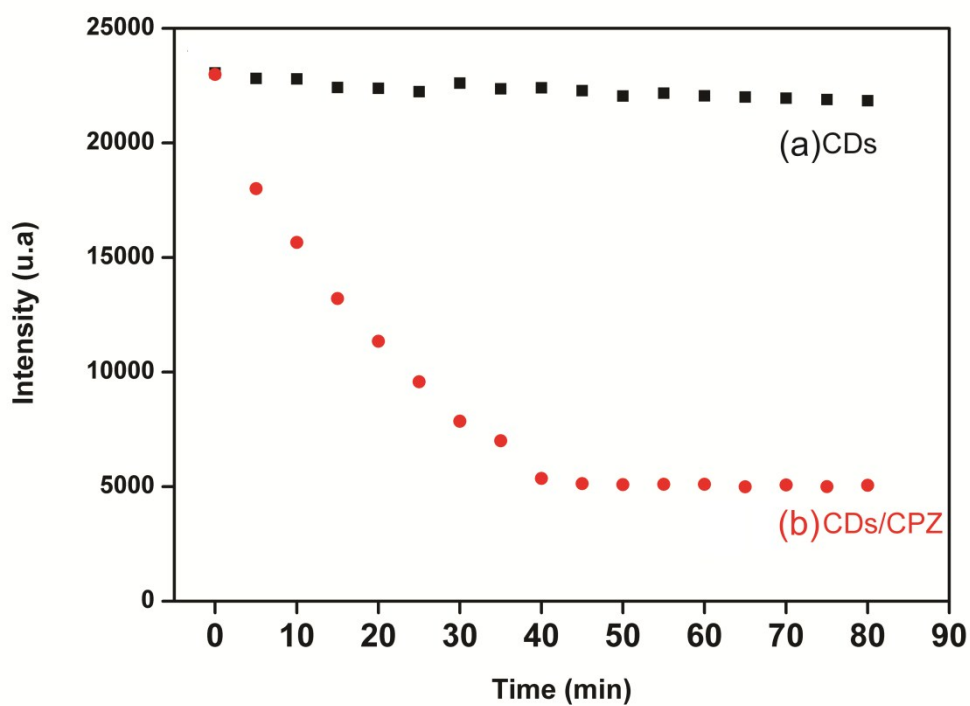

Figure S7. (a) Fluorescence intensity of CDs with the time on continuous irradiation for 1 h. (b) Interaction of CDs with the CPZ and fluorescence intensity decays.

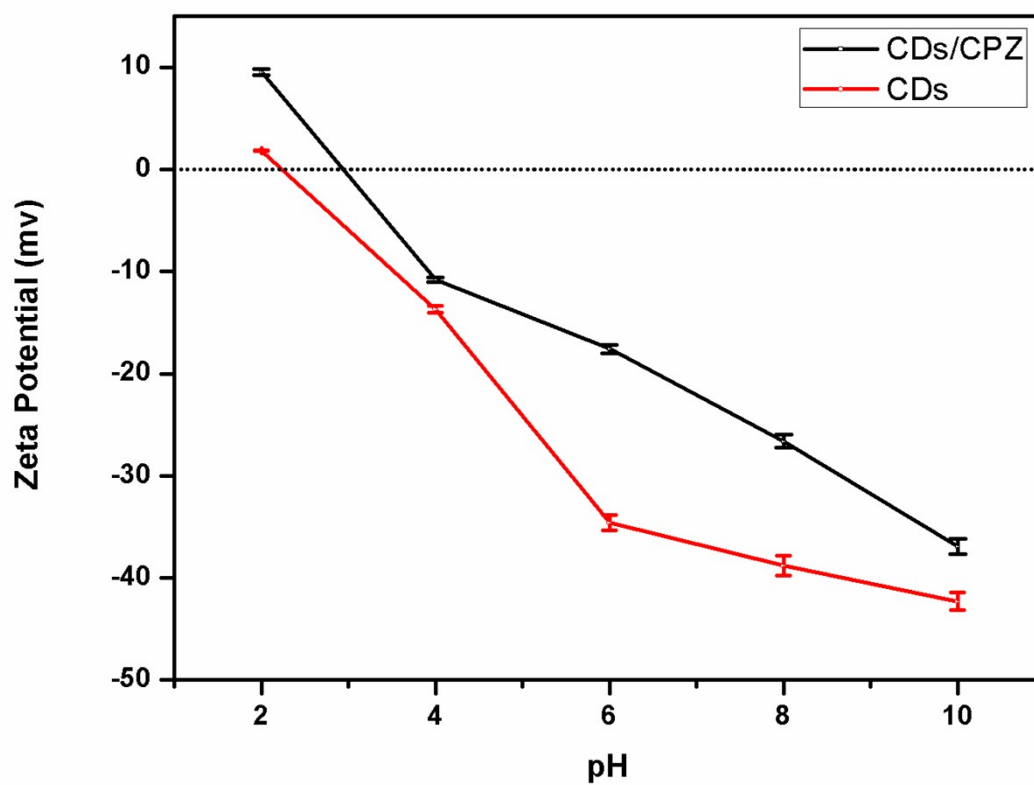

Figure S8. Zeta potential for CDs and CDs/CPZ as a function of pH.

F
